# Supplementary material
Source: publisher figshare collection journal article supplement (https://geolsoc.figshare.com/ndownloader/files/36557193)
Supplement: Supplementary file 1 [file 36557193]

## Sheet: Arkusz1
Sample name/site	Ms (Am2)	Mrs (Am2)	Hc (mT)	Hcr (mT)	Mrs/Ms	Hcr/Hc
Amphibolites
Amf0206 (site AMF1)	1990.67 uAm2	64.75 uAm2	2	10	0.032	5
Amf1306 (site AMF2)	382.18 uAm2	34.52 uAm2	8	32	0.09	4
Amf1701 (site AMF2)	42.01 uAm2	13.88 uAm2	39	70	0.33	1.79487
Amf2106 (site AMF3)	76.20 uAm2	12.87 uAm2	16	64	0.169	4
Amf3506 (site AMF4)	1367.62 uAm2	54.05 uAm2	3	12	0.039	4
Amf4305 (site AMF5)	2.52 uAm2	0.30 uAm2	10	40	0.119	4
Amf10205 (site AMF6)	6.32 uAm2	1.09 uAm2	134	230	0.172	1.71642
Metacarbonates
Hinl 010103 (site MCARB1)	17.86 nAm2	893.3 pAm2	5.183	25.95	0.05	5.00675
Hinl 010105 (site MCARB1)	1.848 nAm2	468.8 pAm2	17.52	68.64	0.2537	3.91781
Hinl 010106 (site MCARB1)	2.827 nAm2	465.0 pAm2	15.76	50.79	0.1645	3.22272
NFL 530201 (site MCARB2)	1.293 nAm2	79.27 pAm2	7.379	47.04	0.0613	6.37485
NFL5105-2 (site MCARB2)	2.154 nAm2	393.0 pAm2	75.73	30.9	0.1825	0.408029
NFL5105-3 (site MCARB2)	5.836 nAm2	799.5 pAm2	12.71	28.58	0.137	2.24862
NFL5105-5 (site MCARB2)	9.075 nAm2	526.2 pAm2	7.652	11.12	0.058	1.45321
NFL6303-02 (site MCARB3)	3.469 nAm2	891.4 pAm2	19.16	111	0.257	5.79332
NFL6303-03 (site MCARB3)	5.134 nAm2	1.218 nAm2	42.23	120.3	0.2372	2.84869
NFL6303-04 (site MCARB3)	29.84 nAm2	3.183 nAm2	26.56	162.8	0.1067	6.12952
Carbonates
NLL7501-1 (site CARB1)	9.186 nAm2	685.7 pAm2	6.174	22.42	0.0746	3.63136
NLL7501-2 (site CARB1)	8.460 nAm2	854.9 pAm2	6.457	22.97	0.1011	3.55738
NLL7501-3 (site CARB1)	7.219 nAm2	592.0 pAm2	6.569	21.12	0.082	3.2151
NLL8403 (site CARB2)	5.255 nAm2	712.6 pAm2	5.93	29.97	0.1356	5.05396
NLL8403-2 (site CARB2)	10.59 nAm2	1.511 nAm2	6.112	31.71	0.1427	5.18815
NLL8403-3 (site CARB2)	4.180 nAm2	748.7 pAm2	6.449	31.99	0.1791	4.96046
NLL9302-3 (site CARB3)	2.115 nAm2	296.5 pAm2	10.18	35.24	0.1402	3.46169
NLL11302-1 (site CARB4)	8.847 nAm2	1.930 nAm2	10.56	47.43	0.2182	4.49148
NLL11302-2 (site CARB4)	8.236 nAm2	1.755 nAm2	10.67	50.26	0.2131	4.7104
NLL11302-3 (site CARB4)	8.840 nAm2	1.739 nAm2	10.11	40.08	0.1967	3.96439
NLL12105-01 (site CARB5)	3.682 nAm2	522.1 pAm2	7.269	26.5	0.1418	3.64562
NLL12105-03 (site CARB5)	8.840 nAm2	1.739 nAm2	10.11	27.48	0.1967	2.7181
						#DIV/0!
Tillites
DLL13203-01 (site TILL6)	8.037 nAm2	721.6 pAm2	5.745	33.64	0.0898	5.85553
DLL13203-02 (site TILL6)	10.29 nAm2	1.042 nAm2	6.078	32.68	0.1013	5.37677
DLL13203-03 (site TILL6)	15.29 nAm2	1.380 nAm2	5.859	31.39	0.0903	5.35757
DLL13203-04 (site TILL6)	9.186 nAm2	769.7 pAm2	5.028	35.69	0.0838	7.09825
